# Supplementary material for: High performance polydimethylsiloxane pervaporative membranes with hyperbranched polysiloxane as a crosslinker for separation of n-butanol from water
Source: Royal Society of Chemistry journal article supplement (doi:10.1039/c5ra06886j), 2015-01-01
Supplement: c5ra06886j1.pdf [file c5ra06886j1.pdf]

High performance polydimethylsiloxane pervaporation  
membranes with hyperbranched polysiloxane as crosslinker for  
separation of *n*-butanol from water

Yunxiang Bai<sup>1</sup>, Jiaqiang Lin<sup>1</sup>, Liangliang Dong<sup>1</sup>, Yuanhua Zhu<sup>1</sup>, Chunfang Zhang<sup>\*1</sup>,

Jin Gu<sup>1</sup>, Yuping Sun<sup>1</sup>, Youyi Xu<sup>2</sup>

<sup>1</sup>The Key Laboratory of Food Colloids and Biotechnology, Ministry of Education,  
School of Chemical and Material Engineering, Jiangnan University, Wuxi 214122,

Jiangsu, China

<sup>2</sup>MOE Key Laboratory of Macromolecule Synthesis and Functionalization,

Department of Polymer Science and Engineering, Zhejiang

University, Hangzhou 310027, P. R. China

---

\* Corresponding author: E-mail address: zcf326@163.com., Tel: 86-510-85917090; Fax: 86-510-85917763.

## 1. PV experiments method

The PV experiments were carried out at various temperatures using a pervaporation cell with the effective membrane area of 35.24 cm<sup>2</sup>. In pervaporation operation, the pressure of downstream side (permeate side) was maintained at 200 ± 10Pa. The permeated mass was collected in a condensation trap cooled by liquid nitrogen. The composition in feed mixture and the corresponding permeate was detected by gas chromatography (GC) SP-6800A (Shangdong, China) equipped with a packed column and a thermal conductivity detector (TCD).

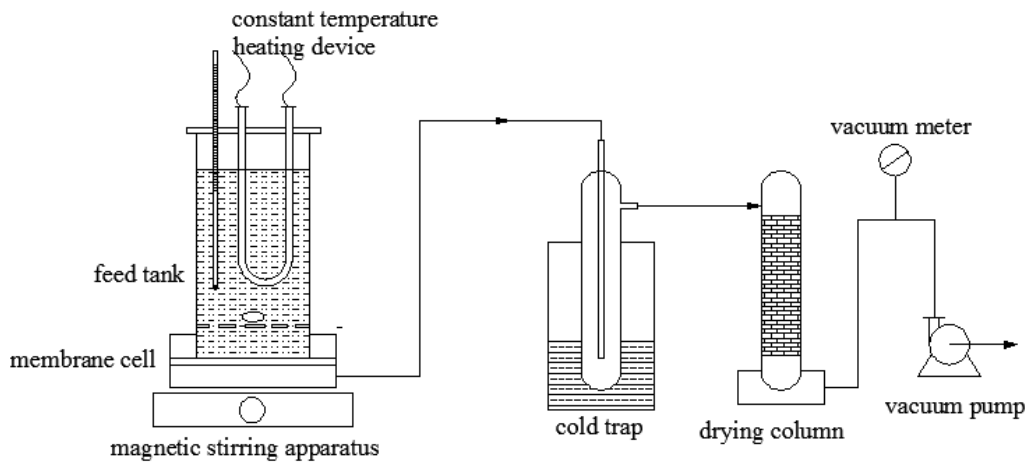

Fig.S1 Schematic diagram of the experimental equipment

## 2. Scanning electron microscope

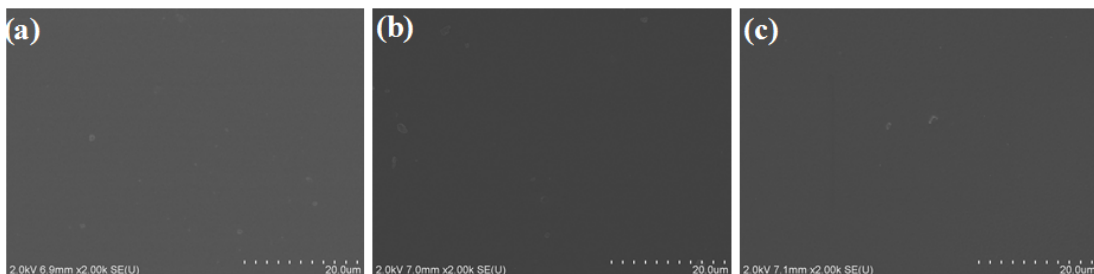

Fig.S2 Surface morphology of HPSiO-c-PDMS membranes: (a) HPSiO-c-PDMS-1, (b) HPSiO-c-PDMS-2, (c) HPSiO-c-PDMS-3

### 3. Contact angle measurements of HPSiO-c-PDMS membranes

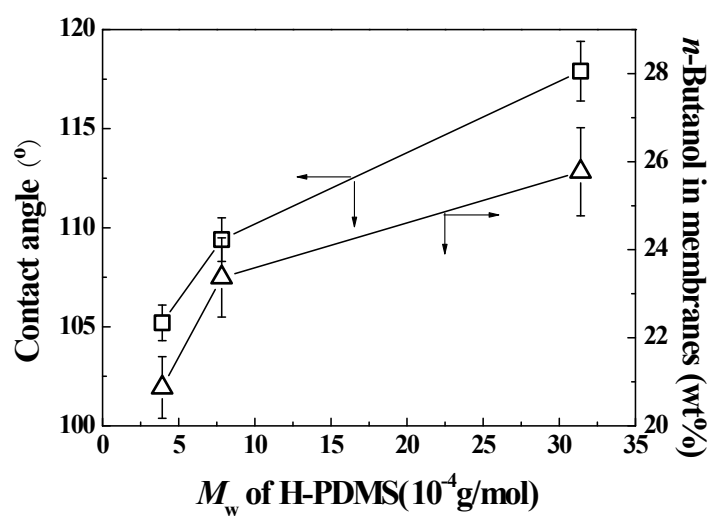

Fig.S3. Effect of H-PDMS molecular weight on *n*-butanol concentration in membranes and contact angle of HPSiO-c-PDMS membranes

### 4. GPC spectroscopy of PDMS

Table S1 Molecular weights and PDI of H-PDMS and HPSiO

| Samples  | Molecular weight |         | PDI <sup>c</sup> |
|----------|------------------|---------|------------------|
|          | $M_w^a$          | $M_n^b$ |                  |
| H-PDMS-1 | 39250            | 24369   | 1.61             |
| H-PDMS-2 | 78263            | 49437   | 1.58             |
| H-PDMS-3 | 314043           | 195815  | 1.60             |
| HPSiO    | 3513             | 1417    | 2.48             |

<sup>a</sup>  $M_w$ , weight average molecular weight;

<sup>b</sup>  $M_n$ , number average molecular weight;

<sup>c</sup> Polydispersity index (PDI) =  $M_w/M_n$
